# Supplementary material for: Dioscin Ameliorates Hyperuricemia-Induced Atherosclerosis by Modulating of Cholesterol Metabolism through FXR-Signaling Pathway
Source: MDPI journal article supplement (doi:10.3390/nu14091983), 2022-05-09
Supplement: s1 [file s1]

## **Supplementary**

### **Supplementary Table Legends:**

**Supplementary Table S1.** The gradient elution of mobile phase for bile acid profile analysis

**Supplementary Table S2.** Primer sequences for Real-time PCR studies on mice

**Supplementary Table S3.** Primer sequences used for Real-time PCR studies on HepG2 cells

Supplementary Table S1. The gradient elution of mobile phase for bile acid profile analysis

| Time (min) | Flow rate (mL/min) | A (%) | B (%) |
|------------|--------------------|-------|-------|
| 0          | 0.4                | 95    | 5     |
| 5          | 0.4                | 95    | 5     |
| 5.5        | 0.4                | 80    | 20    |
| 14         | 0.4                | 80    | 20    |
| 19         | 0.4                | 70    | 30    |
| 24         | 0.4                | 70    | 30    |
| 24.5       | 0.4                | 60    | 40    |
| 27.5       | 0.4                | 60    | 40    |
| 30.5       | 0.4                | 20    | 80    |
| 32.5       | 0.4                | 20    | 80    |
| 33.5       | 0.4                | 95    | 5     |
| 35         | 0.4                | 95    | 5     |

Supplementary Table S2. Primer sequences for Real-time PCR studies on mice

| Gene name | Forward sequence (5' to 3') | Reverse sequence (5' to 3') |
|-----------|-----------------------------|-----------------------------|
| FXR       | CCCCTGCTTGATGTGCTAC         | CGTGGTGATGGTTGAATGTC        |
| SHP       | CGATCCTCTTCAACCCAGATG       | AGGGCTCCAAGACTTCACACA       |
| FGF15     | TGTTTCACCGCTCCTTCTTT        | TCTACATCCTCCACCATCCTG       |
| FGFR4     | GCATCTTTCAGGGGACACCA        | TTGTACCAGTGACGACCACG        |
| CYP7A1    | CTGGGCTGTGCTCTGAAGT         | GGGAGTTTGTGATGAAGTGGA       |
| CYP8B1    | ACAGCGTGATGGAGGAGAGT        | AGGGGAAGAGAGCCACCTTA        |
| CYP7B1    | TGAGGTTCTGAGGCTGTGC         | TGGAGGAAAGAGGGCTACAA        |
| HMGCR     | AGCTTGCCCGAATTGTATGTG       | TCTGTTGTGAACCATGTGACTTC     |
| GAPDH     | TGTGTCCGTCGTGGATCTGA        | CCTGCTTCACCACCTTCTTGAT      |

Supplementary Table S3. Primer sequences used for Real-time PCR studies on HepG2 cells

| Gene name | Forward sequence (5' to3') | Reverse sequence (5' to3') |
|-----------|----------------------------|----------------------------|
| FXR       | TACATGCGAAGAAAGTGTCAAGA    | ACTGTCTTCATTACGGTCTGAT     |
| SHP       | TCAAGTCCATTCCGACCAGC       | AAGAAGGCCAGCGATGTCAA       |
| BSEP      | TGATCCTGATCAAGGGAAGG       | GGCAAACAACACTGGTTCCT       |
| GAPDH     | CCAGCAAGAGCACAAGAGGA       | GAGATTCAGTGTGGTGGGGG       |
